# Supplementary material for: Computational and experimental analysis of bioactive peptide linear motifs in the integrin adhesome
Source: PubMed Central journal article supplement (PMC6349357; doi:10.1371/journal.pone.0210337), 2019-01-28
Supplement: pone.0210337.s001.pdf [file pone.0210337.s001.pdf]

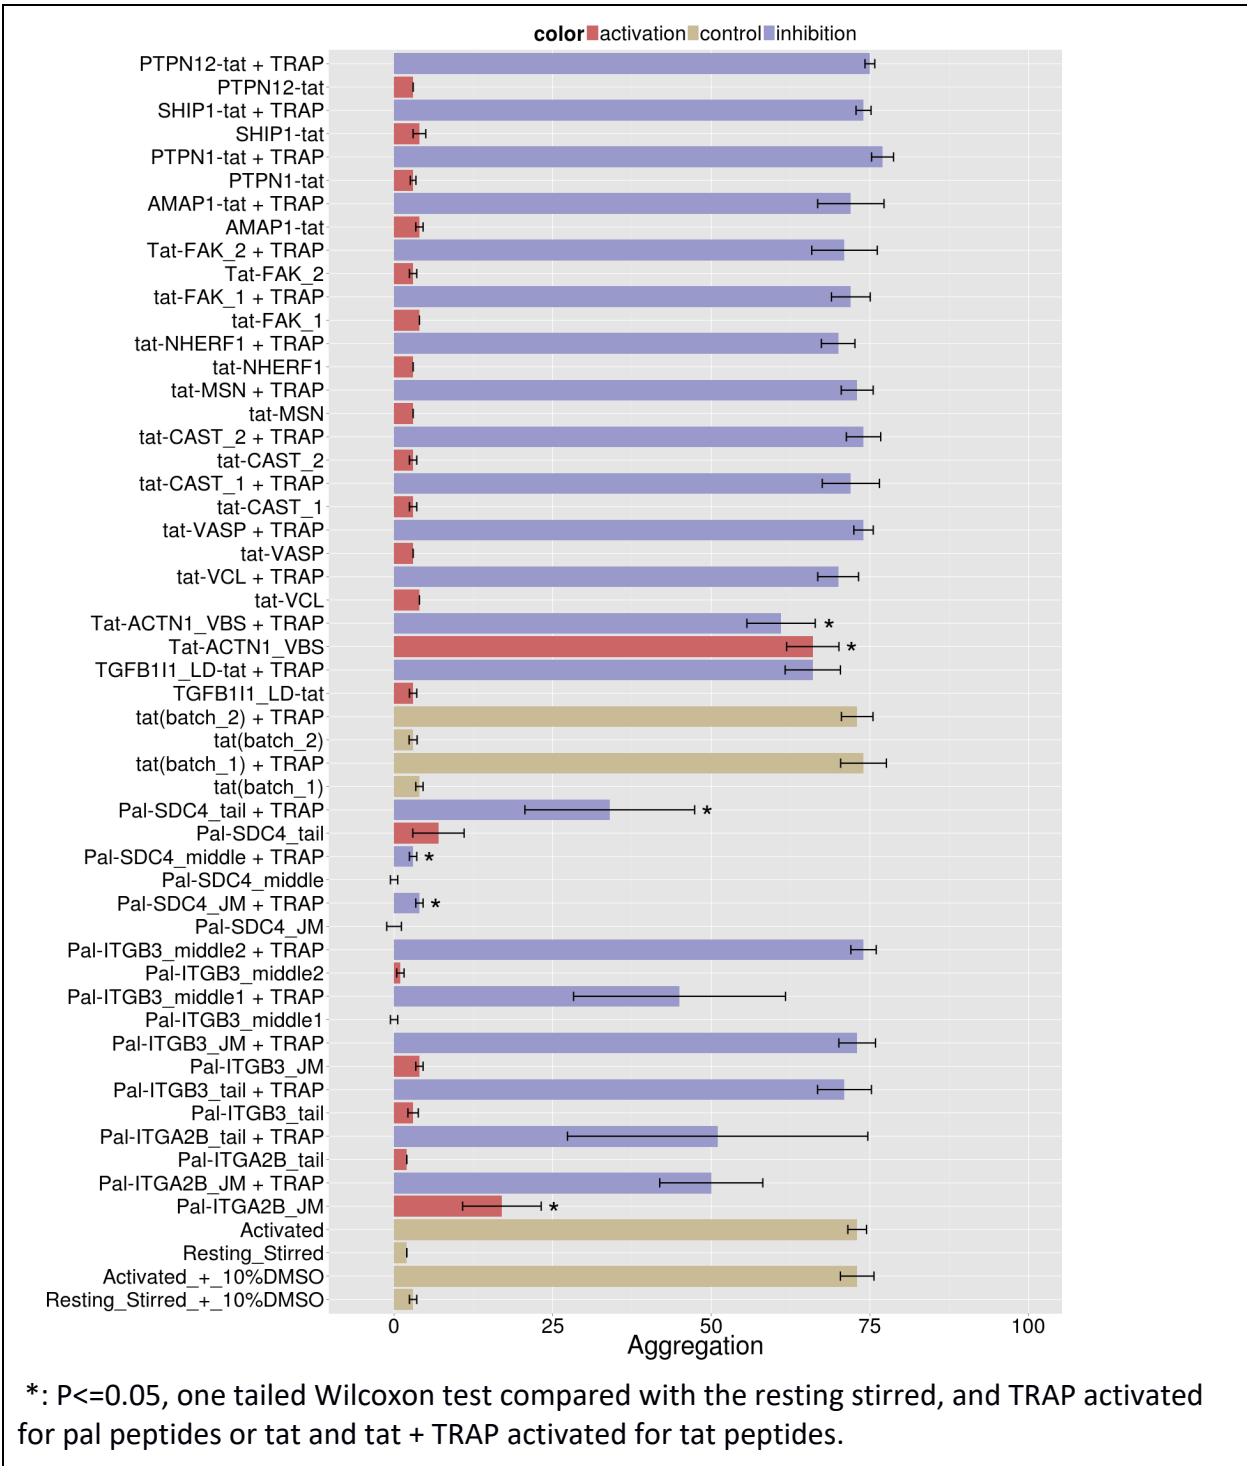

**S1 Fig** Aggregation results before and after TRAP activation for all peptides. Palmitylated (pal) peptide=20μM, tat peptide=50μM, TRAP: 4μM. Error bars: standard error of the mean.
