# Supplementary material for: Computational and experimental analysis of bioactive peptide linear motifs in the integrin adhesome
Source: PubMed Central journal article supplement (PMC6349357; doi:10.1371/journal.pone.0210337), 2019-01-28
Supplement: pone.0210337.s002.pdf [file pone.0210337.s002.pdf]

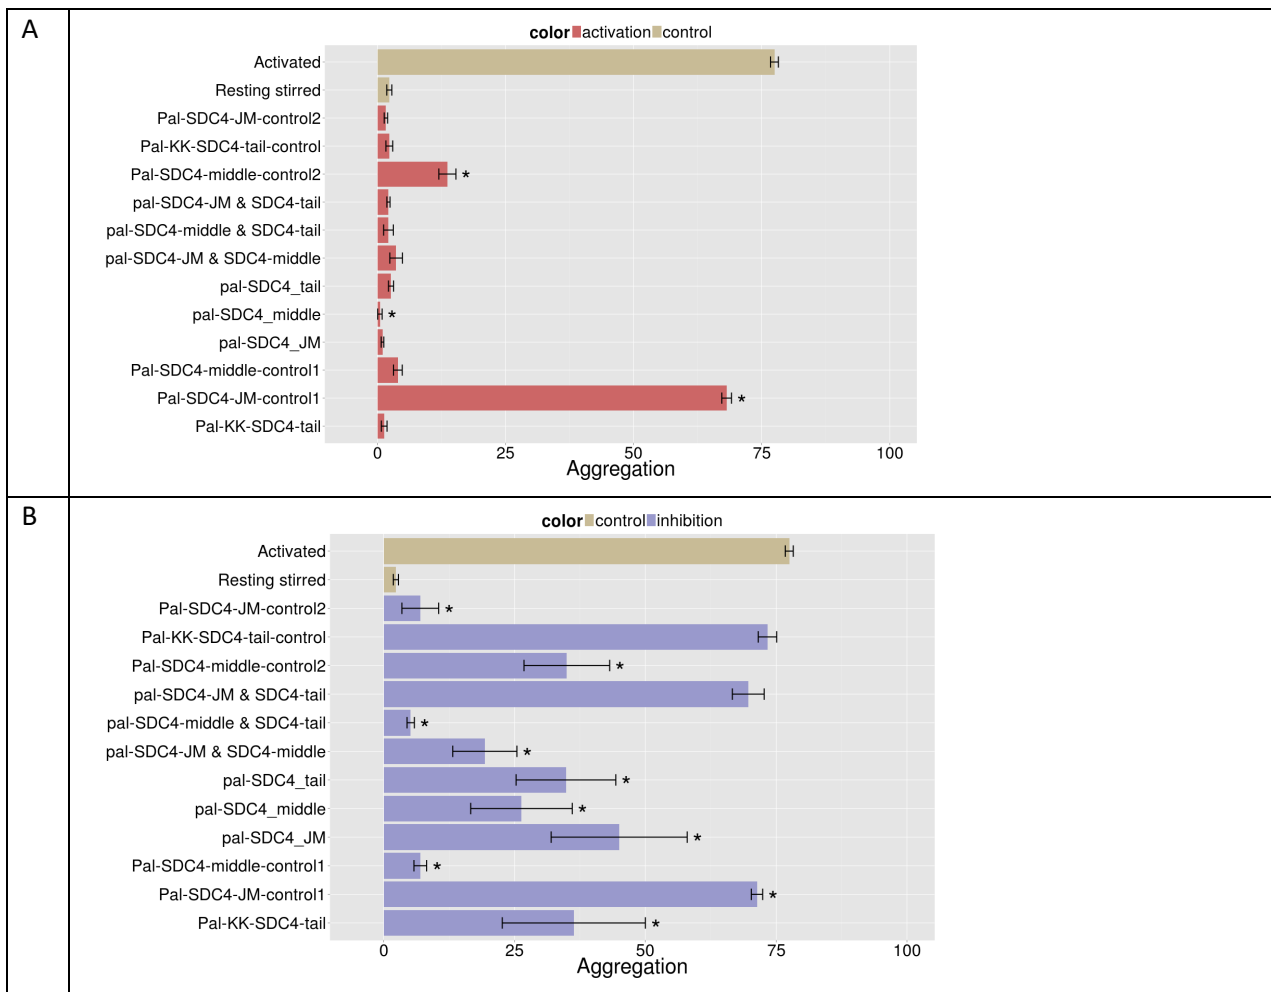

**S2 Fig. Sequence-specificity of the syndecan-4 derived peptide pal-SDC4\_tail.** Peptide effects (n=6 donors, \* P <=0.05, Two tailed Wilcoxon signed-rank test compared with Activated or Resting Stirred) compared with scrambled controls (n=3 donors, 1-tailed test) (A) Effects on activation of aggregation, observations at 20µM. No strong effects were seen at 1 and 5 µM except for the activatory effect of pal-SDC4\_JM\_Control1 which showed activatory effects at all three doses. (B) effects on inhibition of platelet aggregation induced by 4 µM TRAP.
