# Supplementary material for: Computational and experimental analysis of bioactive peptide linear motifs in the integrin adhesome
Source: PubMed Central journal article supplement (PMC6349357; doi:10.1371/journal.pone.0210337), 2019-01-28
Supplement: pone.0210337.s004.pdf [file pone.0210337.s004.pdf]

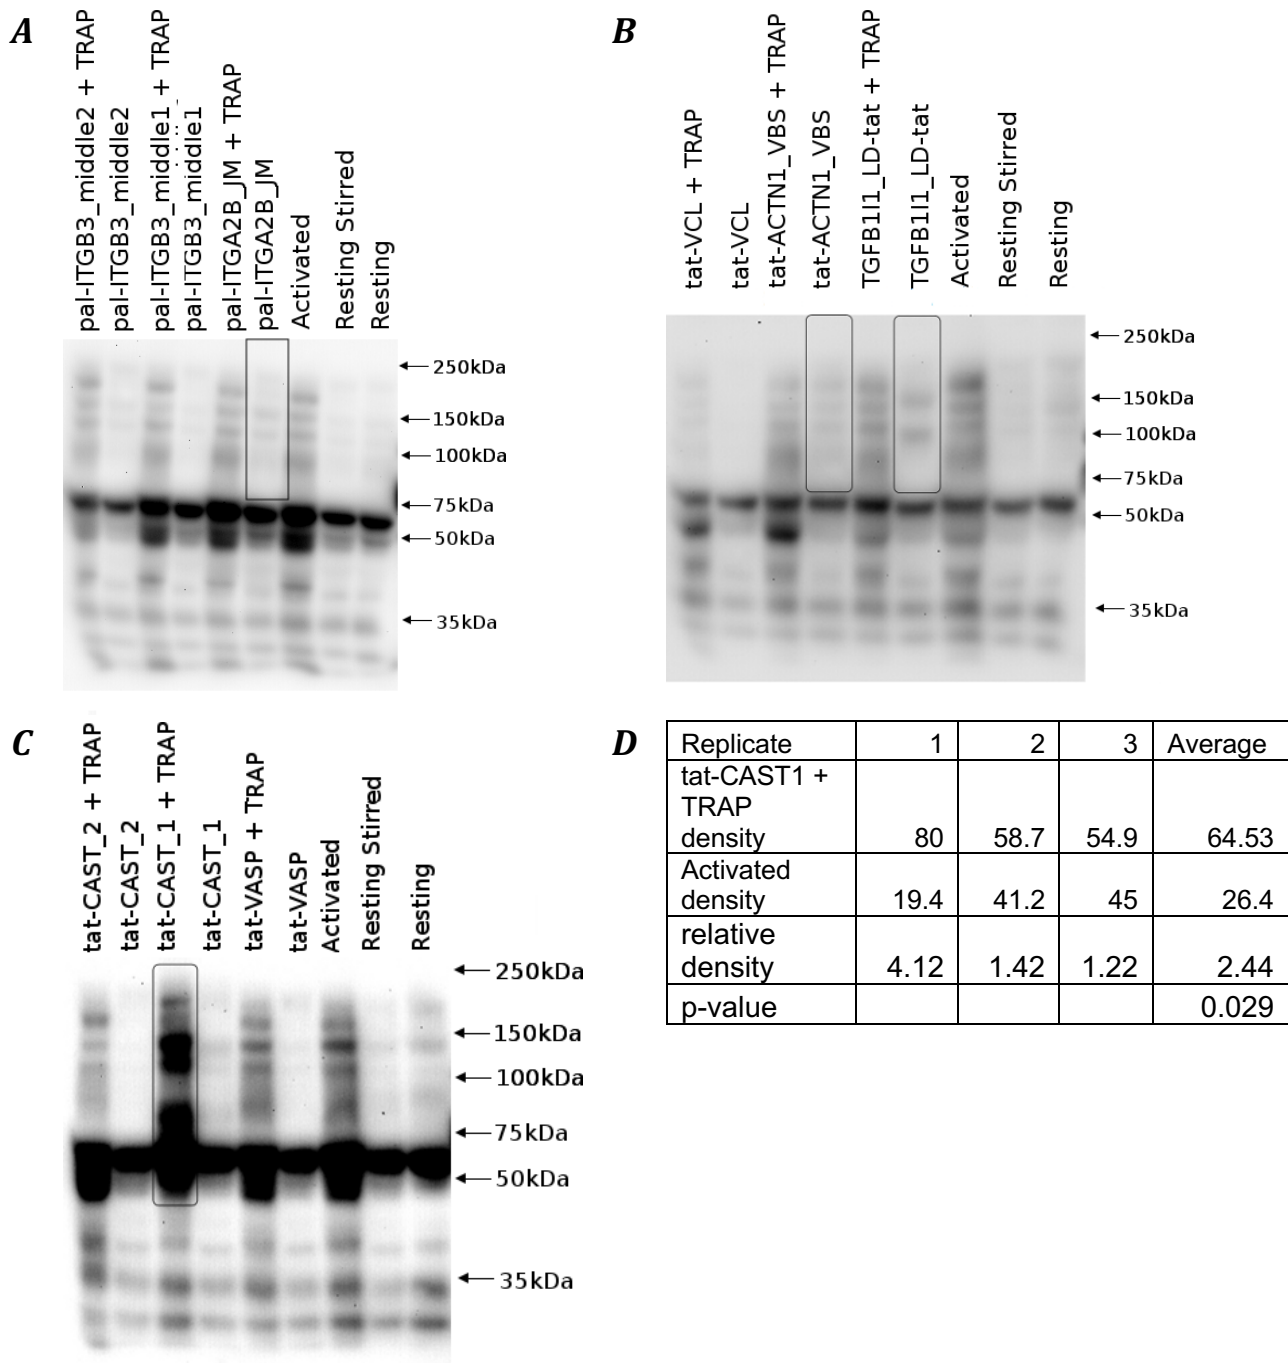

**S4 Fig: Phosphorylation changes during platelet activation in response to peptide.** Phosphotyrosine western blots (4G10 antibody) of resting platelets with added peptide, and after TRAP stimulation of platelets pre-incubated with peptide. Palmitylated (pal) peptides:20 $\mu$ M; tat peptides:50 $\mu$ M; TRAP: 4 $\mu$ M. Results are shown where at least one peptide is associated with a change in phosphorylation profile (boxed) for (A) pal-ITGA2B\_JM peptide (B) tat-ACTN1\_VBS and TGFB111\_LD-tat peptides (C) tat-CAST-1 peptide. (D) shows the relative density of the tat-CAST-1 peptide lane to the activated control sample.
