# Supplementary material for: Computational and experimental analysis of bioactive peptide linear motifs in the integrin adhesome
Source: PubMed Central journal article supplement (PMC6349357; doi:10.1371/journal.pone.0210337), 2019-01-28
Supplement: pone.0210337.s005.pdf [file pone.0210337.s005.pdf]

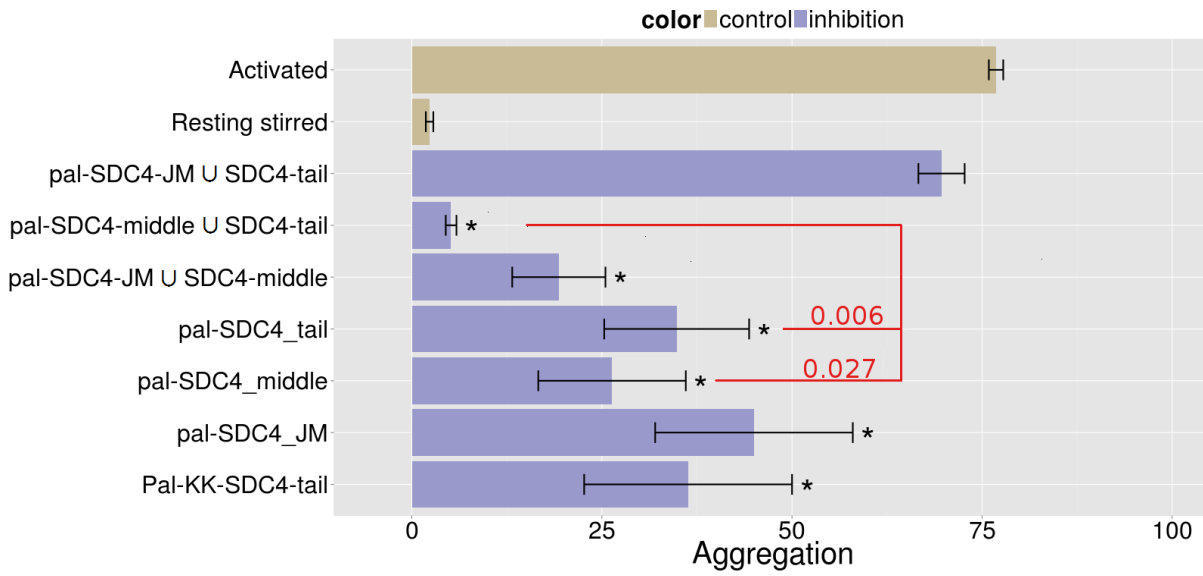

**S5 Fig: Chimeric peptides from Syndecan 4 cytoplasmic region.** Inhibition of platelet activation in response to TRAP (peptide:20μM,TRAP=4μM, n=6):\*  $P \leq 0.05$ , two-tailed Wilcoxon signed-rank test compared with TRAP activated control, red: p-value from comparisons of indicated groups. Error bars: standard error.
