# Supplementary material for: Computational and experimental analysis of bioactive peptide linear motifs in the integrin adhesome
Source: PubMed Central journal article supplement (PMC6349357; doi:10.1371/journal.pone.0210337), 2019-01-28
Supplement: pone.0210337.s006.pdf [file pone.0210337.s006.pdf]

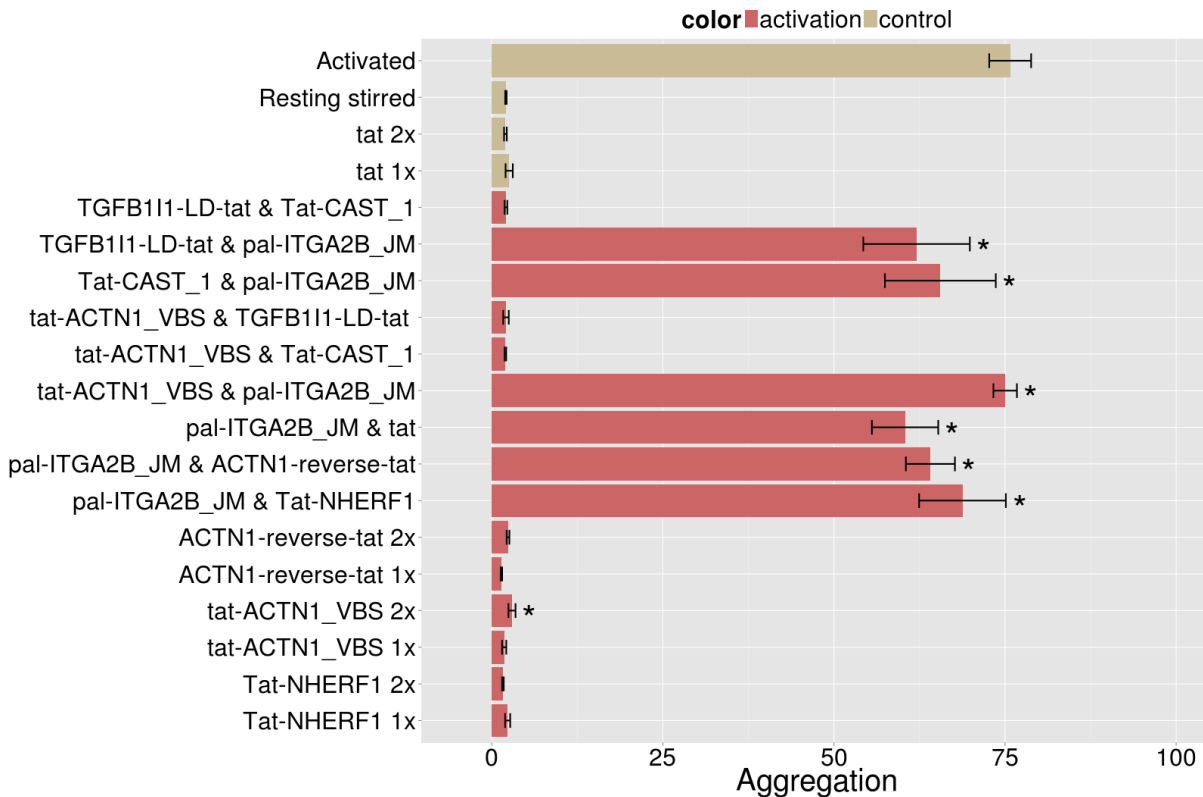

**S6 Fig: Effects of combining pal-ITGA2B\_JM and tat peptides in tests for synergy.** Palmitoylated (Pal) peptide concentrations are 10 $\mu$ M; tat peptide concentrations are 20 $\mu$ M; TRAP Control: 2 $\mu$ M; n=3. Error bars indicate the standard error of the mean. \* P  $\leq$  0.05, One tailed Wilcoxon signed-rank test compared with the tat 2x + low dose TRAP. The strong effect of tat alone suggests that the strong synergism of the other tat containing peptides reflects a synergy of the tat peptide region alone.
