# Supplementary material for: Computational and experimental analysis of bioactive peptide linear motifs in the integrin adhesome
Source: PubMed Central journal article supplement (PMC6349357; doi:10.1371/journal.pone.0210337), 2019-01-28
Supplement: pone.0210337.s007.pdf [file pone.0210337.s007.pdf]

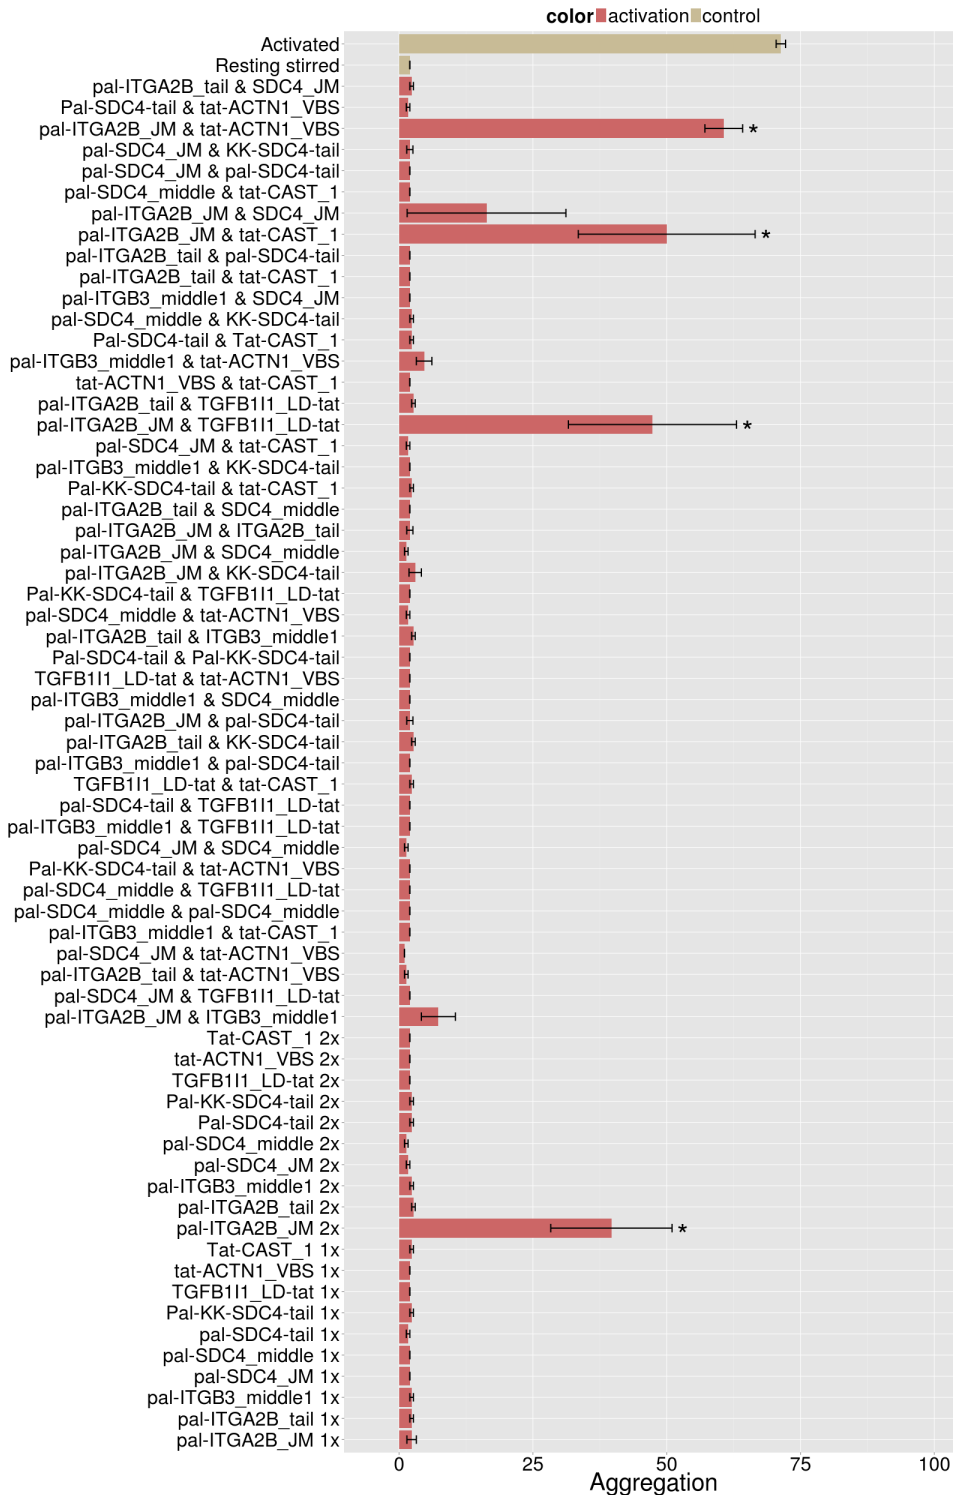

**S7 Fig: Effects of combinations of peptides on platelet activation.** Platelet aggregation induced in resting platelets after 6 minutes incubation with peptides, quantified as optical density using an aggregometer, n=3. \*: P<=0.05, one tailed Wilcoxon test compared with Resting Stirred peptide.
