# Supplementary material for: Computational and experimental analysis of bioactive peptide linear motifs in the integrin adhesome
Source: PubMed Central journal article supplement (PMC6349357; doi:10.1371/journal.pone.0210337), 2019-01-28
Supplement: pone.0210337.s008.pdf [file pone.0210337.s008.pdf]

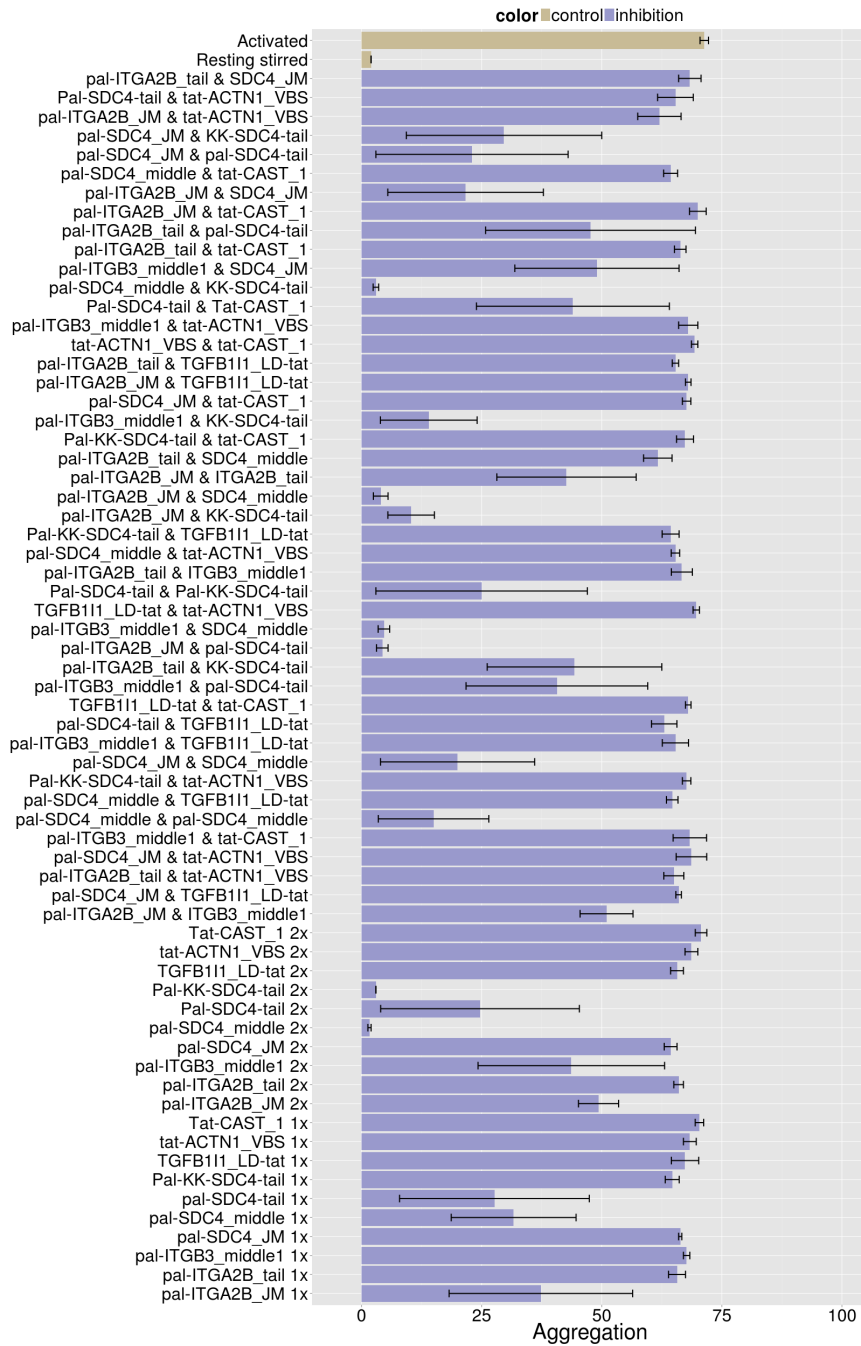

**S8 Fig: Effects of combinations of peptides on inhibition of platelet activation.** inhibition of TRAP (2 μM) activation of platelets after pre-incubation of the platelets for 6 minutes with the peptides, quantified as optical density using an aggregometer, n=3
