# Supplementary material for: Computational and experimental analysis of bioactive peptide linear motifs in the integrin adhesome
Source: PubMed Central journal article supplement (PMC6349357; doi:10.1371/journal.pone.0210337), 2019-01-28

**S10 Fig: Differential platelet activation by ACTN1\_VBS peptide depending on N or C terminal addition of the tat cell-penetrating peptide.** Activation screening of the reverse tat (peptide:50μM. Activated control: platelet stimulated by 4μM TRAP):\* P ≤ 0.05, One tailed Wilcoxon signed-rank test compared with the tat control. Error bars indicate the standard error of the mean. n=4.

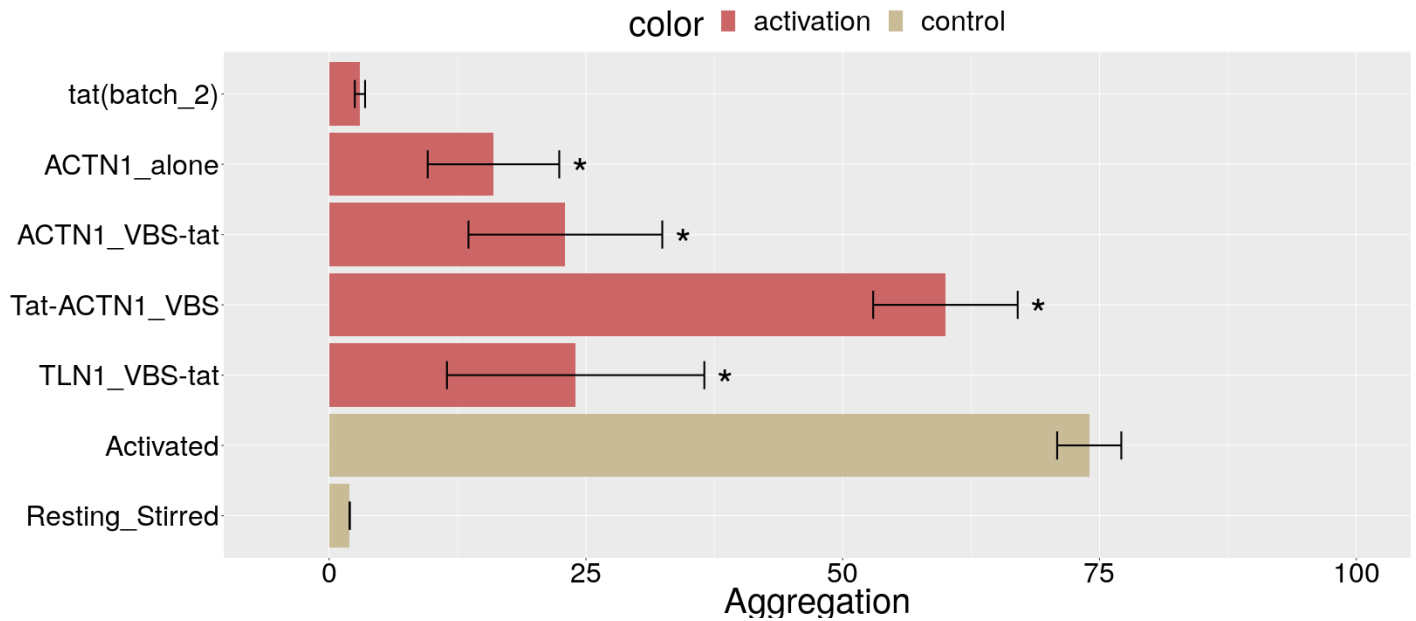

Supplement: pone.0210337.s010.pdf [file pone.0210337.s010.pdf]
