# Supplementary material for: Computational and experimental analysis of bioactive peptide linear motifs in the integrin adhesome
Source: PubMed Central journal article supplement (PMC6349357; doi:10.1371/journal.pone.0210337), 2019-01-28
Supplement: pone.0210337.s011.pdf [file pone.0210337.s011.pdf]

| Human gene name | Phenotype of double knockout of mouse orthologue[1] |
|-----------------|-----------------------------------------------------|
| ITGA2B          | bleeding platelets do not bind fibrinogen           |
| ITGB3           | bleeding; reduced survival                          |
| SDC4            | delayed wound healing                               |
| TGFB111         | not known                                           |
| ACTN1           | not known                                           |
| VCL             | embryonic lethal                                    |
| VASP            | hyperplasia of megakaryocytes                       |
| CAST            | augmented DNA fragmentation                         |
| MSN             | Normal                                              |
| NHERF1          | Phosphate irregularities                            |
| FAK             | Die during organogenesis                            |
| AMAP1           | Not known                                           |
| PTPN1           | Lower adiposity, insulin sensitivity                |
| INPP5D          | Lack of transplant rejection                        |
| PTPN12          | Embryonic lethal                                    |

**S1 Table. Phenotypic consequences of deleting adhesome components**
