# Supplementary material for: Computational and experimental analysis of bioactive peptide linear motifs in the integrin adhesome
Source: PubMed Central journal article supplement (PMC6349357; doi:10.1371/journal.pone.0210337), 2019-01-28
Supplement: pone.0210337.s012.pdf [file pone.0210337.s012.pdf]

| <b>A</b> | Peptide                                | Aggregation | src | fyn | syndesmos | syntenin | PKC | PIP2 |
|----------|----------------------------------------|-------------|-----|-----|-----------|----------|-----|------|
|          | Pal-SDC4_JM                            | 45          | Y   | Y   | Y         |          |     |      |
|          | Pal-SDC4_middle                        | 26          |     |     | ?         |          | Y   | Y    |
|          | Pal-SDC4_tail                          | 34          |     |     |           | Y        |     |      |
|          | Pal-SDC4_JM <sub>U</sub> SDC4_middle   | 19          | Y   | Y   | Y         |          | Y   | Y    |
|          | Pal-SDC4_middle <sub>U</sub> SDC4_tail | 5           |     |     | ?         | Y        | Y   | Y    |
|          | Pal-SDC4_JM <sub>U</sub> SDC4_tail     | 69          | Y   | Y   | Y         | Y        |     |      |
|          |                                        |             |     |     |           |          |     |      |

  

| <b>B</b> | Region                     | 20 $\mu$ M                          | Sequence    | Positive charges | Negative charges |
|----------|----------------------------|-------------------------------------|-------------|------------------|------------------|
|          | pal-SDC4_JM                | Inhibitor                           | RMKKKDEGSYD | 4                | 3                |
|          | pal-SDC4_JM Control 1      | Activator (also at 1 and 5 $\mu$ M) | YKDSMERDKGK | 4                | 3                |
|          | pal-SDC4_JM Control 2      | Inhibitor                           | MGYRKEDKDKS | 4                | 3                |
|          | pal-SDC4_middle            | Inhibitor                           | LGKKPIYKK   | 4                | 0                |
|          | pal-SDC4_middle Control 1  | Inhibitor and mild activator        | KIKGPKLKY   | 4                | 0                |
|          | pal-SDC4_middle Control 2  | Inhibitor and mild activator        | IGLPKKKYK   | 4                | 0                |
|          | pal-SDC4_tail              | Inhibitor                           | APTNEFYA    | 0                | 1                |
|          | pal-KK-SDC4_tail           | Inhibitor                           | KKAPTNEFYA  | 2                | 1                |
|          | pal-KK-SDC4_tail Control 1 | No effect                           | NTYAFKAKEP  | 2                | 1                |

**S2 Table. Peptide activities & literature-described interactions of syndecan peptide regions with protein interaction partners.**

(A) Inhibition effects of syndecan-derived peptides (Aggregation data is shown in more detail in Fig. S8). A subscripted U between two peptide region names denotes the chimerization of the two regions as a single peptide, and the indicated interactions are inferred from the component peptide regions. (B) Summary of effects of SDC4-derived palmitylated peptides and their scrambled controls.
